# Supplementary material
Source: PubMed Central journal article supplement (PMC4376668)
Supplement: NIHMS668565-supplement-supplemntals.pdf [file NIHMS668565-supplement-supplemntals.pdf]

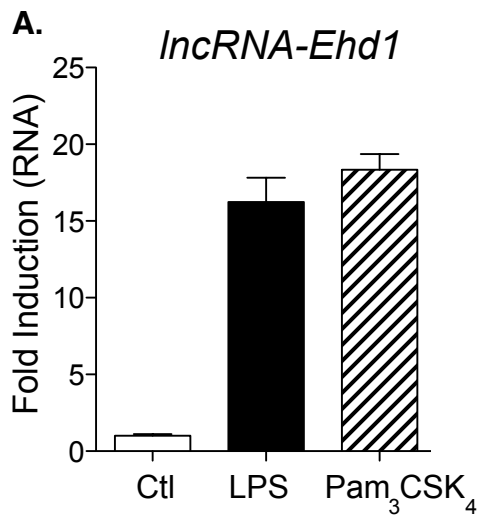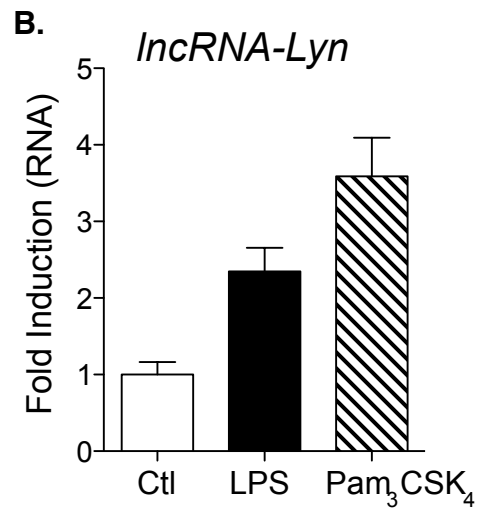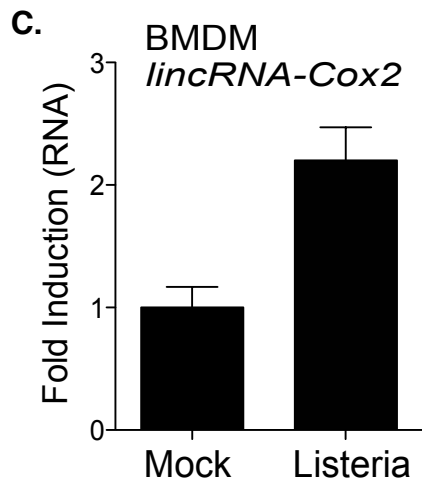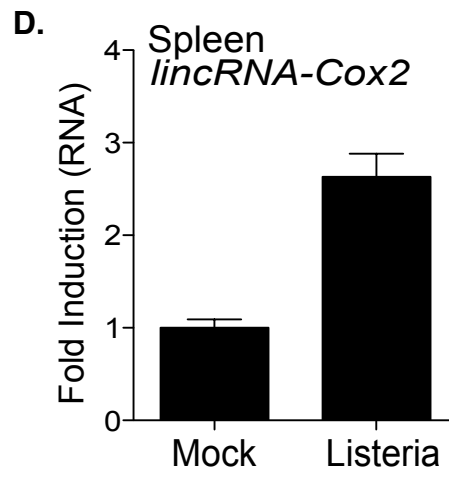

**Fig. S1**

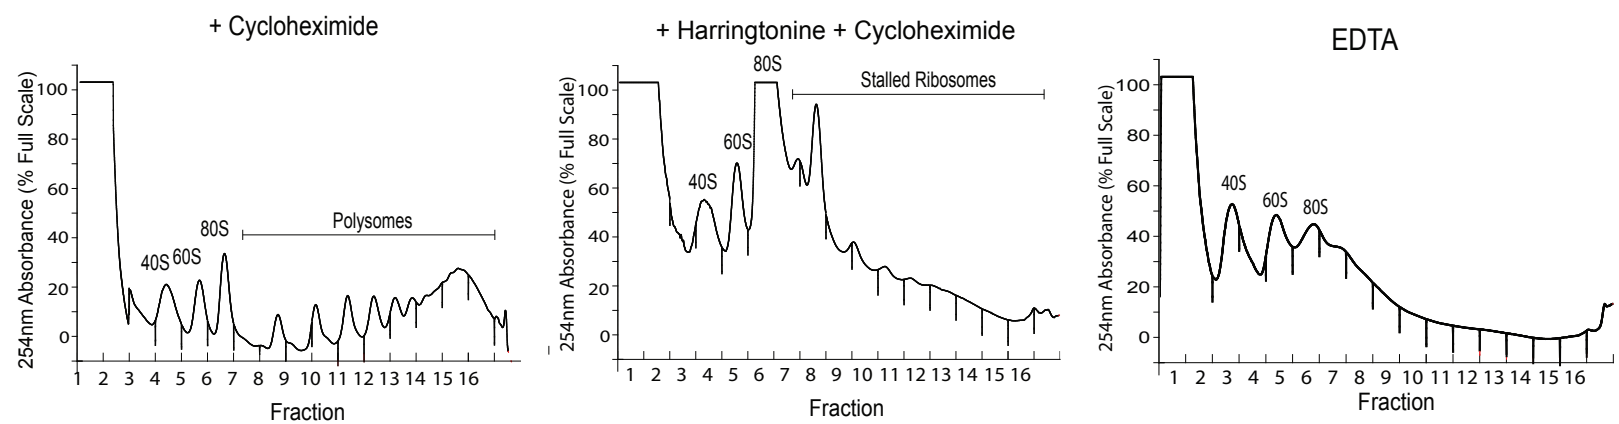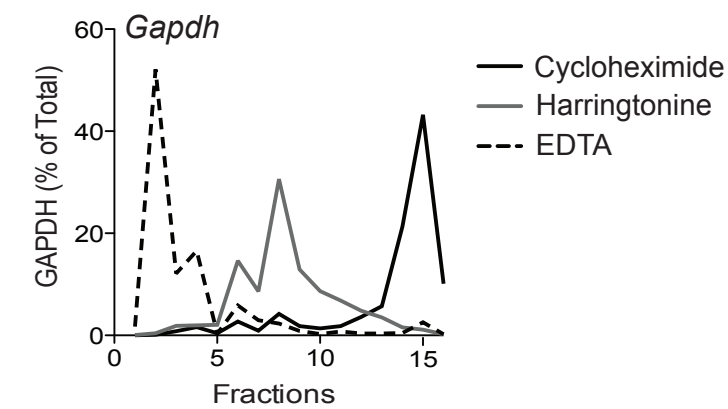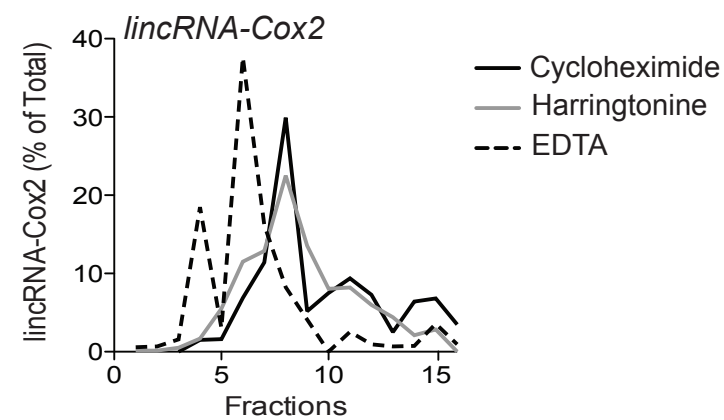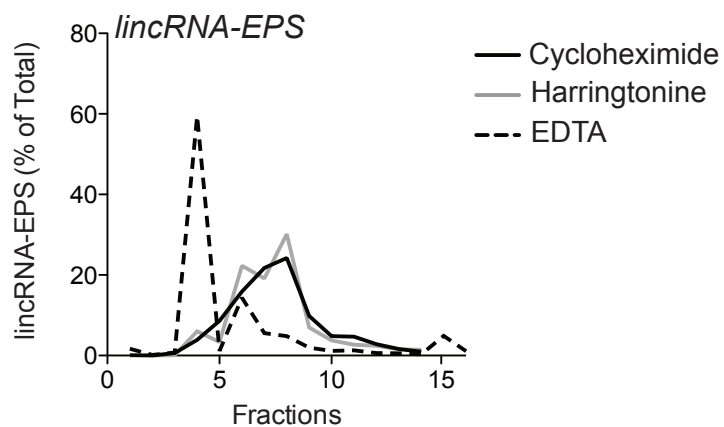

fig. S2

**(A)**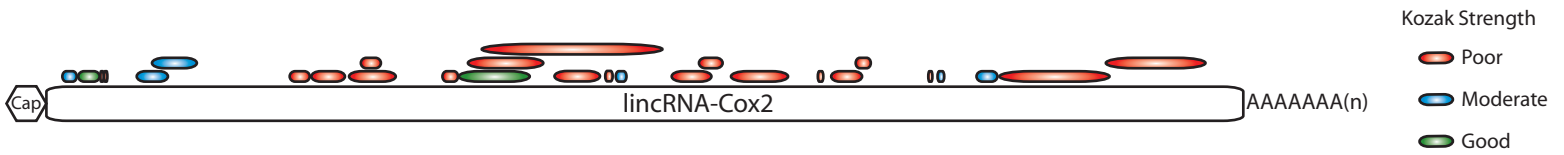**(B)**

| Position  | Nucleotide Sequence     | Peptide Sequence  | Predicted Molecule | Kozak Strength |
|-----------|-------------------------|-------------------|--------------------|----------------|
| 29-46     | atgcgcgggacattctga      | MRGTF*            |                    | Moderate       |
| 53-103    | atgccagagacaaaaagga     | MPRDKKEAWRCEK     |                    | Good           |
| 103-111   | atgagttga               | MS*               |                    | Very Poor      |
| 111-116   | atgtga                  | M*                |                    | Very Poor      |
| 142-186   | atgctgtactcttgaactttct  | MLYSWNFLDKRKH/    |                    | Moderate       |
| 179-229   | atgcataagactcctcacctct  | MHKTPHLSASAHKT    |                    | Moderate       |
| 370-396   | atgtggtatctaacaggcaca   | MWYLTGTG*         |                    | Very Poor      |
| 401-448   | atgagccctatggaagagctg   | MSPMEELWAGQPK/    |                    | Moderate-Poor  |
| 456-524   | atggcaagtaggagagcatt    | MASRRFLRESVLK     |                    | Moderate-Poor  |
| 509-514   | atgtaa                  | M*                |                    | Very Poor      |
| 600-617   | atgaaacatttaggataa      | MKHLG*            |                    | Poor           |
| 617-724   | atggctagcagaaaatttgaa   | MASRKFESESESF     |                    | Good           |
| 681-746   | atgaatctgaatgtatatttccc | MNLNVYFPSWKLFT    |                    | Poor           |
| 691-921   | atgtatatttccttcttgaaa   | MYISLPGNFSLASK/   |                    | Very Poor      |
| 750-833   | atgtatgtcagtggtcttgcct  | MYVSVLCLSFTHFC/   |                    | Very Poor      |
| 836-850   | atgctttcatttaa          | MLSF*             |                    | Poor           |
| 866-898   | atgaggctcctcagattgttc   | MRLLQIVHSN*       |                    | Moderate       |
| 942-1004  | atgcagatagcttttgcaacta  | MQIAFATMWCFLGT    |                    | Very Poor      |
| 1001-1015 | atgatagagccctaa         | MIEP*             |                    | Very Poor      |
| 1029-1115 | atgtgcatattgtagttgttg   | MCILLVVGWLLLFA    |                    | Very Poor      |
| 1157-1165 | atgccctaa               | MP*               |                    | Poor           |
| 1184-1225 | atgataactttatccttccccct | MITLSFPPQFFLI*    |                    | Poor           |
| 1222-1239 | atgatgttaaaagattga      | MMLKD*            |                    | Poor           |
| 1326-1331 | atgtga                  | M*                |                    | Very Poor      |
| 1342-1350 | atgaactga               | MN*               |                    | Moderate       |
| 1398-1427 | atgaggcctcagccctacaca   | MRPQPYTRN*        |                    | Moderate       |
| 1431-1598 | atgctgagagtgggagaaat    | MLRVGEIVLSREEHI   |                    | Very Poor      |
| 1574-1723 | atgtgtatattatattatatt   | MCVYYIILTLHIICIT/ |                    | Very Poor      |

**fig.S3**

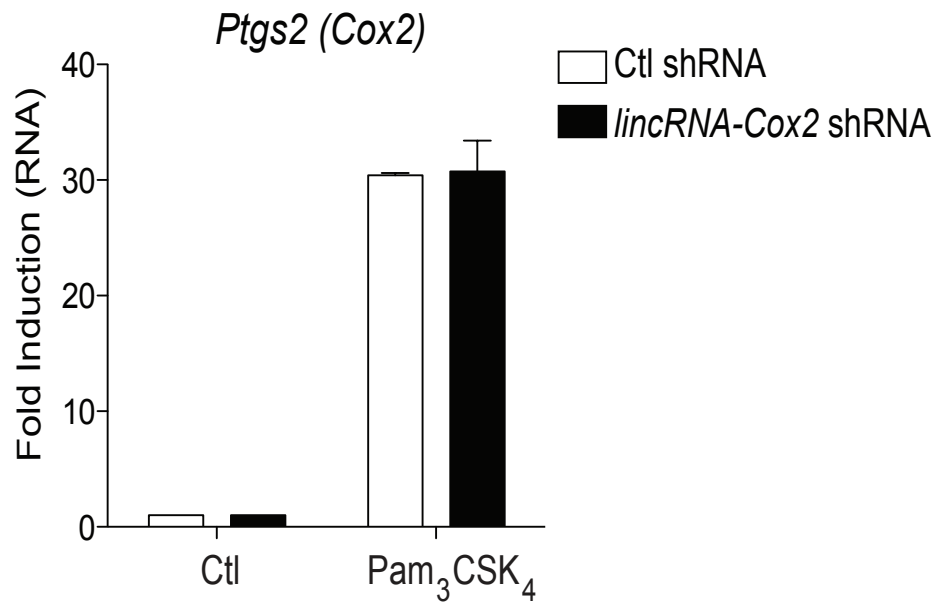

fig.S4

A.

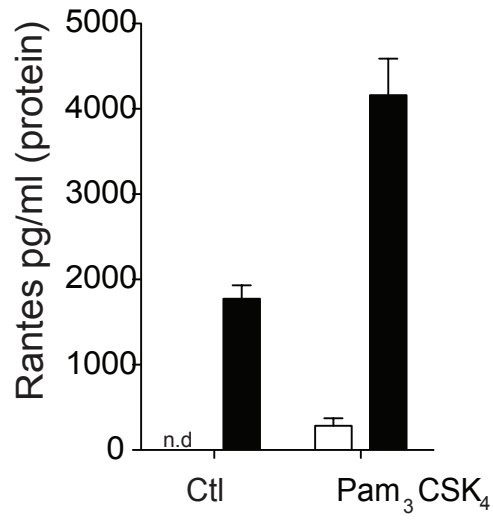

B.

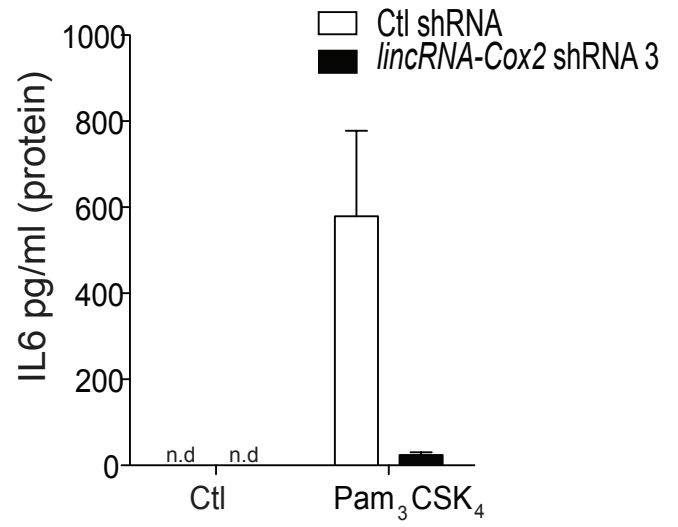

fig. S5

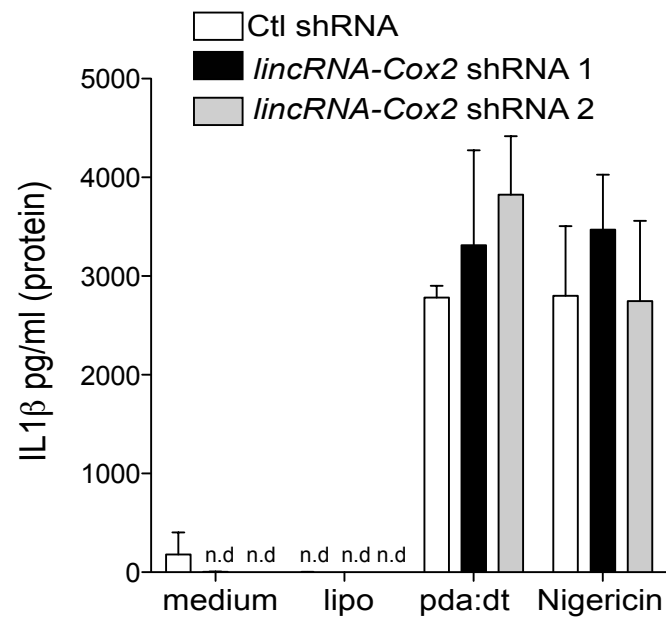

Fig. S6

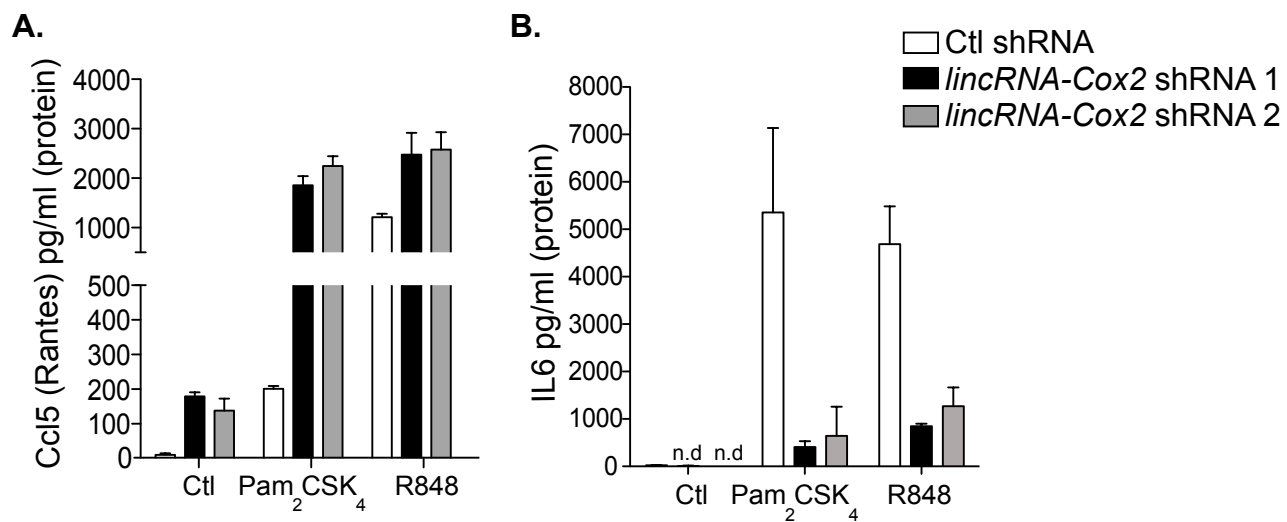

**Fig. S7**

**A.**

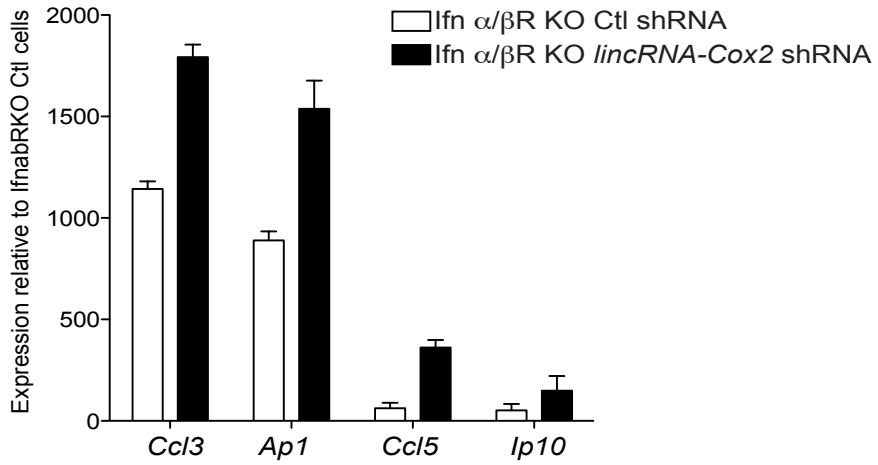

**B.**

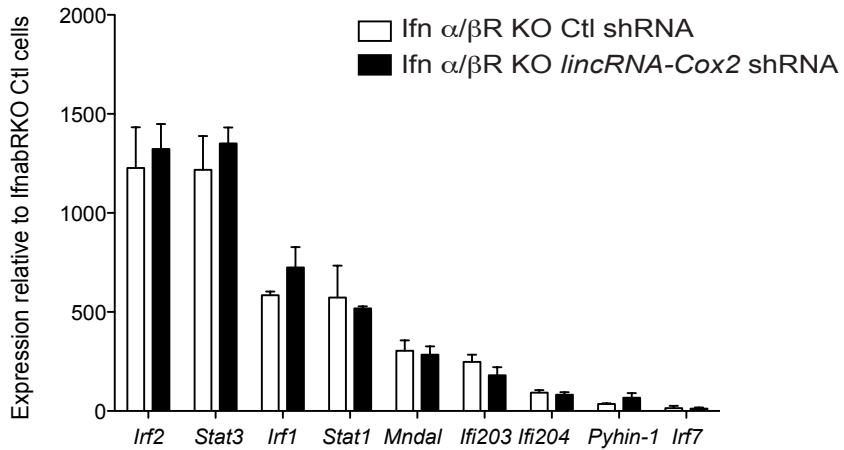

**fig. S8**



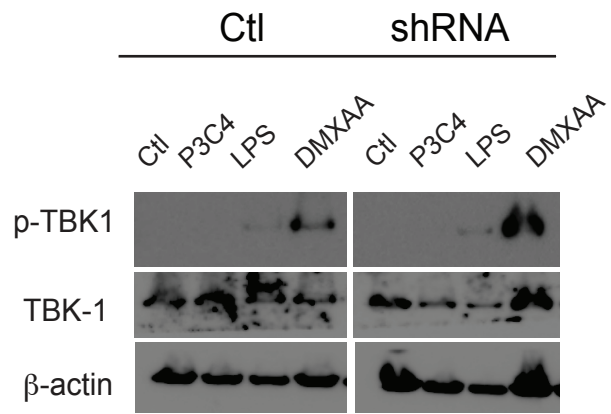

fig. S9

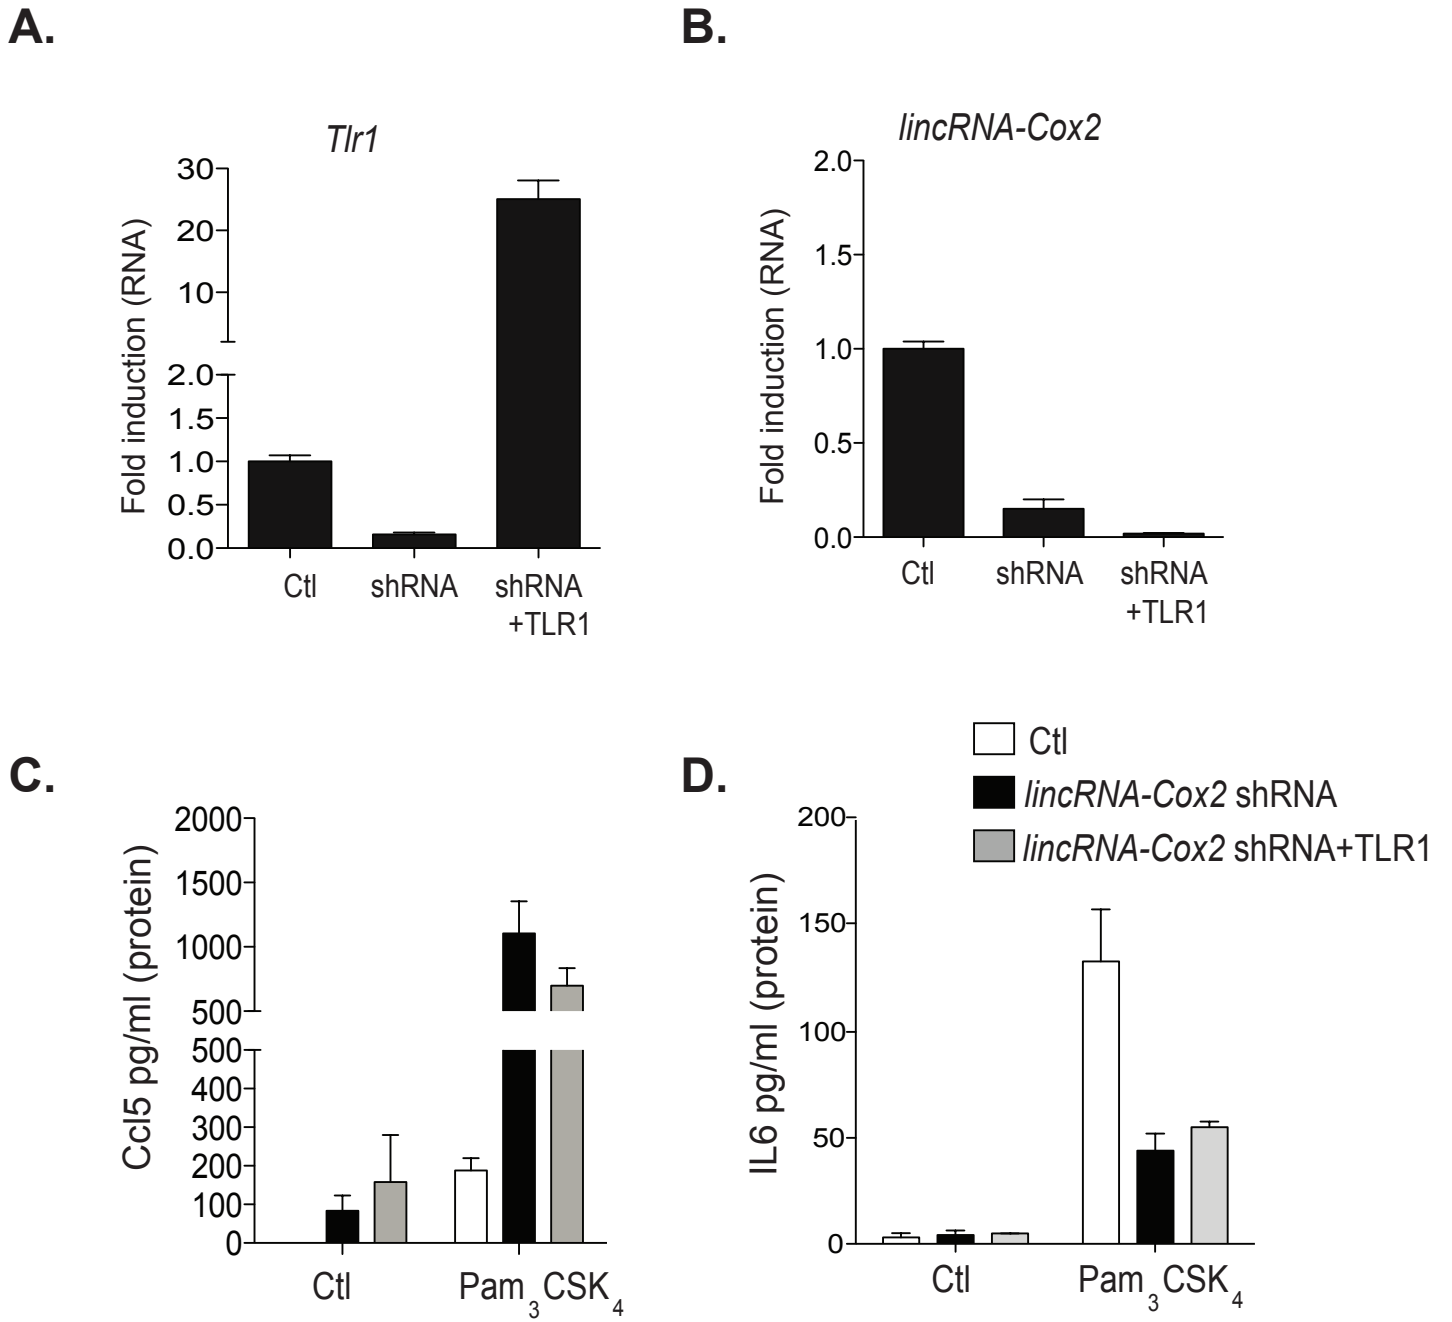

**fig.S10**

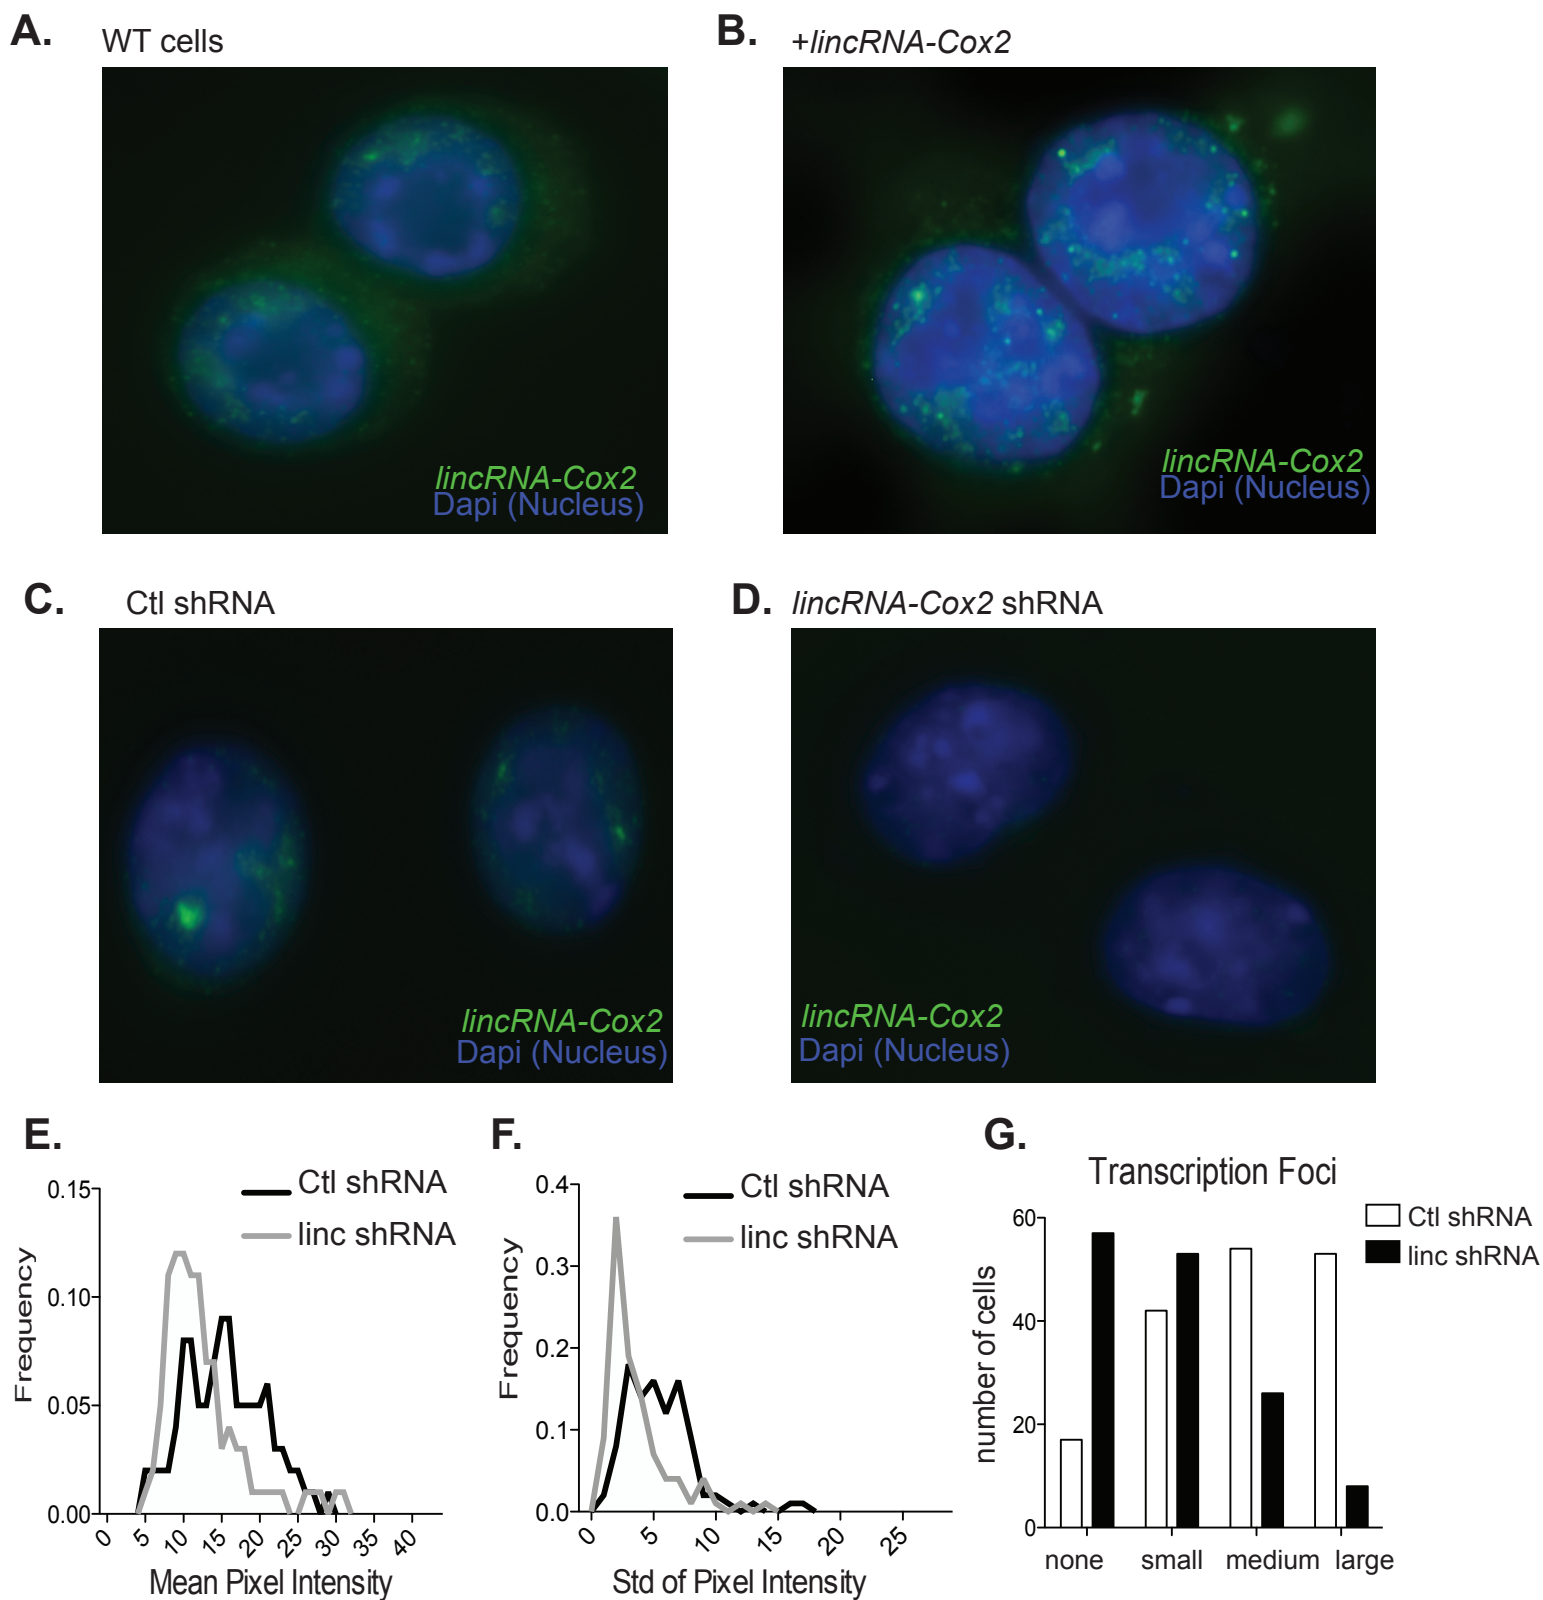

fig. S11

*lincRNA-Cox2*  
1,608bp

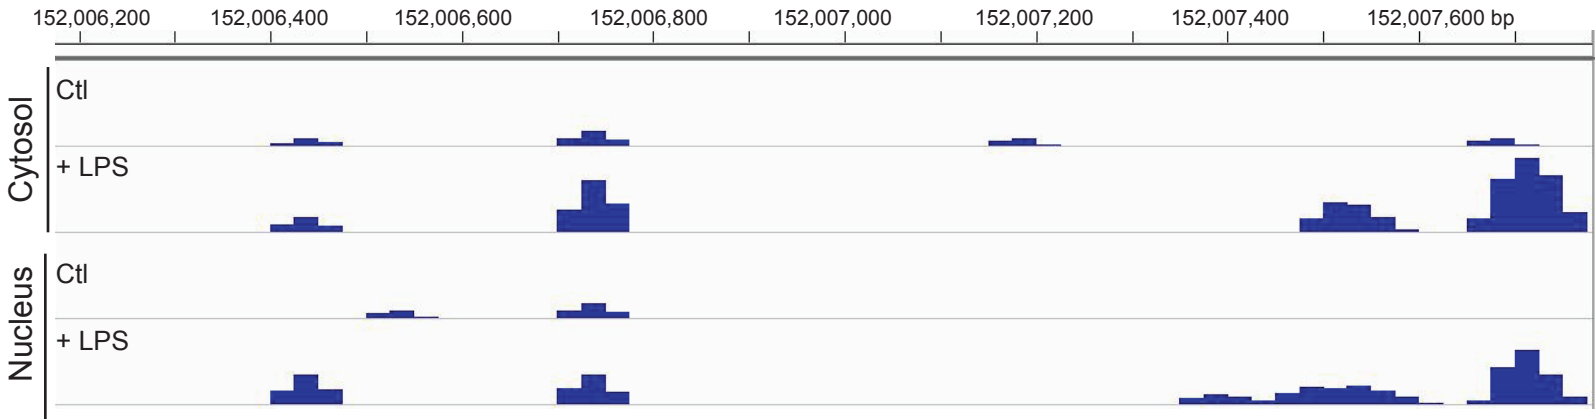

**Fig. S12**

**A.**

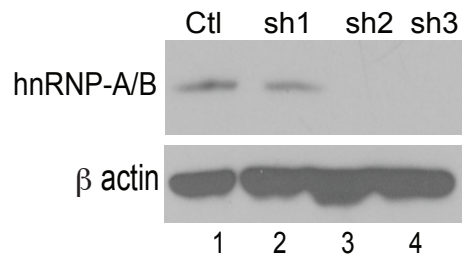

**B.**

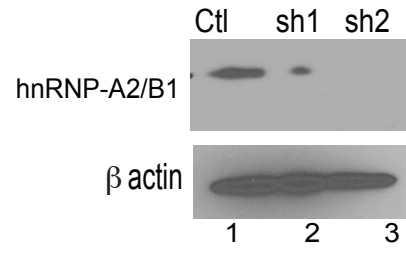

**fig. S13**

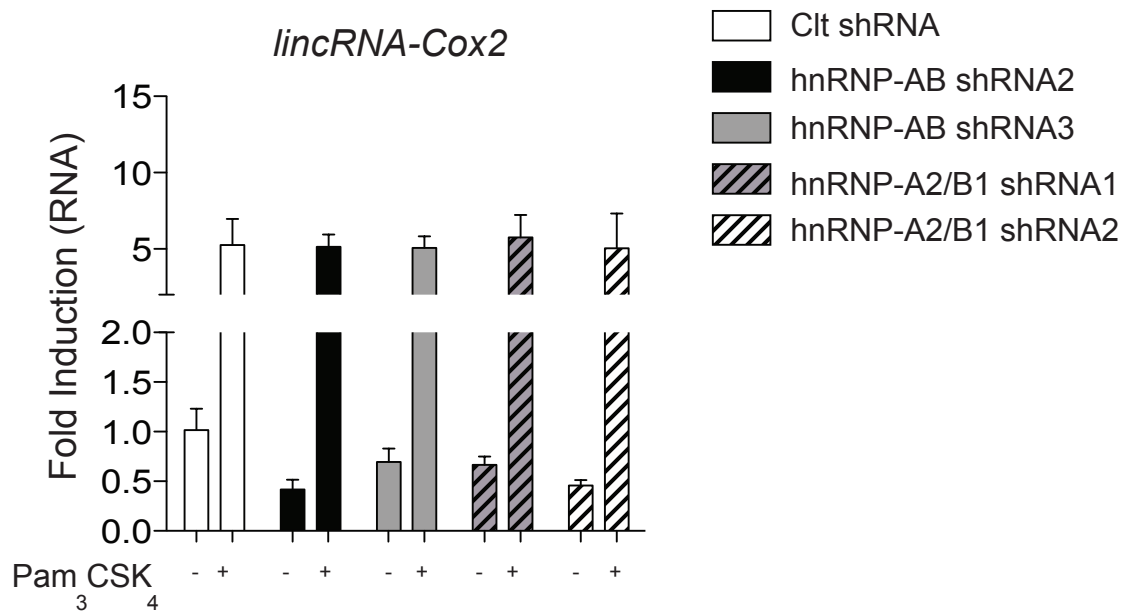

**fig.S14**

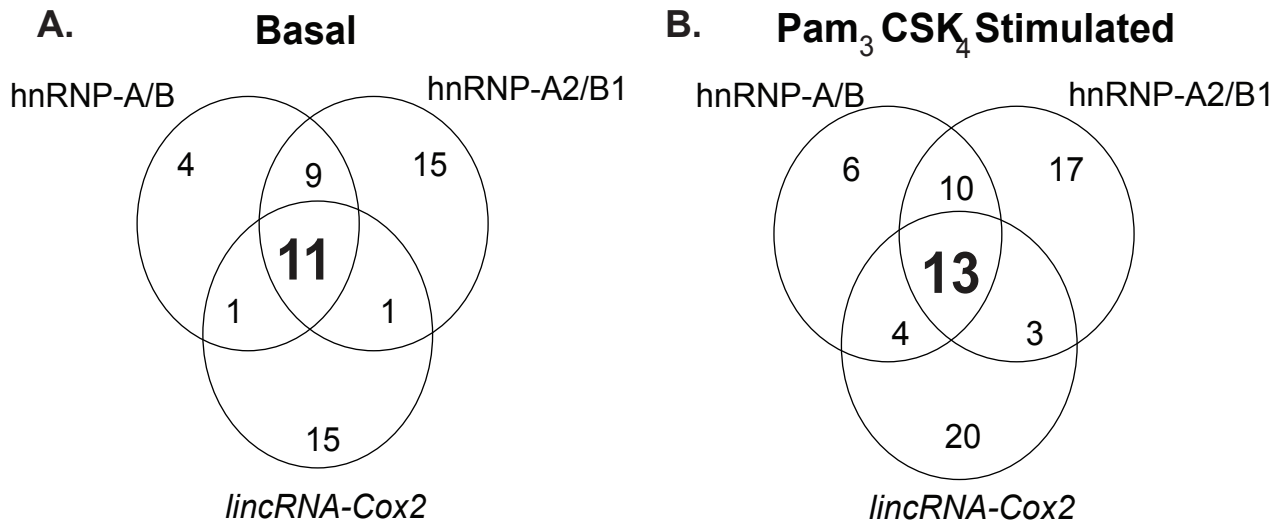

**C.**

| Common Genes  |                                   |
|---------------|-----------------------------------|
| Basal         | Pam <sub>3</sub> CSK <sub>4</sub> |
| <i>Mnda</i>   | <i>Mnda</i>                       |
| <i>Ifi204</i> | <i>Ifi204</i>                     |
| <i>Ifit1</i>  | <i>Ifit1</i>                      |
| <i>Il1RA</i>  | <i>Ifit2</i>                      |
| <i>Stat1</i>  | <i>Stat1</i>                      |
| <i>Ccl10</i>  | <i>Cxcl10</i>                     |
| <i>Ccl5</i>   | <i>Ccl5</i>                       |
| <i>Tlr8</i>   | <i>Nos2</i>                       |
| <i>Ccl4</i>   | <i>Ifi205</i>                     |
| <i>Casp1</i>  | <i>Irf5</i>                       |
| <i>Prdm1</i>  | <i>Prdm1</i>                      |
|               | <i>Il1b</i>                       |
|               | <i>Il10</i>                       |

**fig. S15**

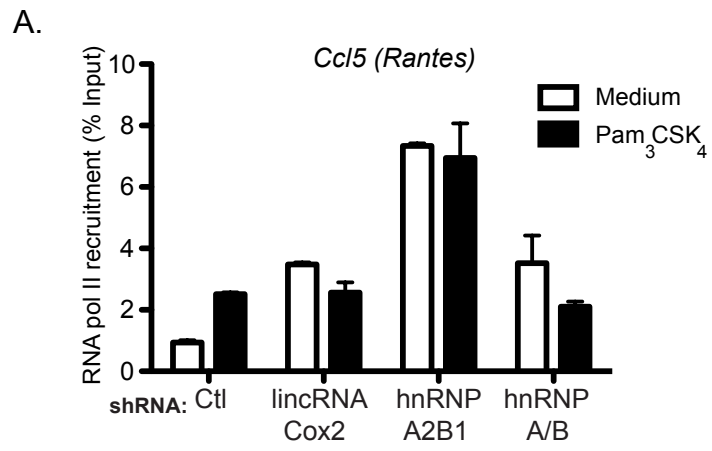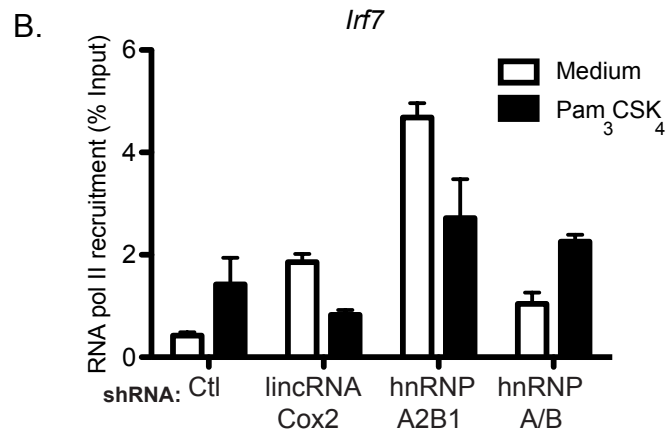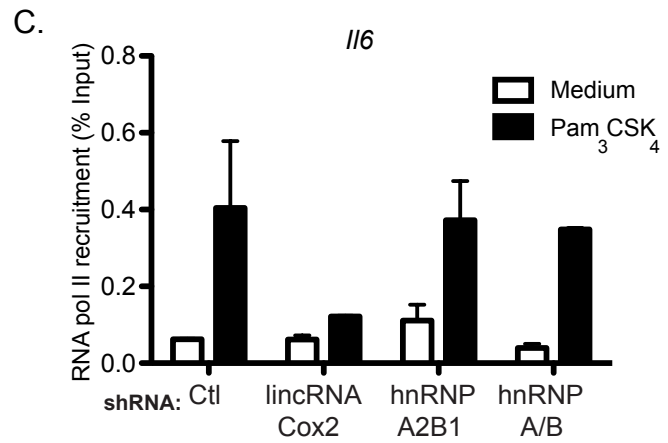

fig.S16



**A.**

|                    |   |   |   |
|--------------------|---|---|---|
| Ctl vector         | + | - | - |
| <i>lincRNACox2</i> | - | + | + |
| GFP shRNA          | + | + | - |
| hnRNPA2/B1 sh      | - | - | + |

hnRNP A2B1

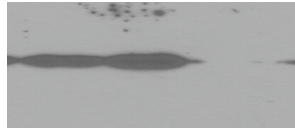

B-actin

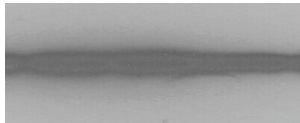**B.**

|                    |   |   |   |
|--------------------|---|---|---|
| Ctl vector         | + | - | - |
| <i>lincRNACox2</i> | - | + | + |
| GFP shRNA          | + | + | - |
| hnRNPA/B sh        | - | - | + |

hnRNP AB

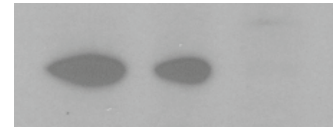

B-actin

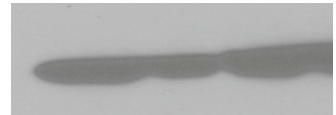**fig.S17**

## Supplemental Figure legends

**Fig. S1. *lincRNA-Ehd1* and *lincRNA-Lyn* are inducible by LPS and Pam3CSK4, *lincRNA-Cox2* is inducible by *Listeria* in macrophages and spleen.** qRT-PCR was carried out on primary BMDMs stimulated with LPS (TLR4) (100ng/ml) and Pam<sub>3</sub>CSK<sub>4</sub> (TLR1/2) (100nM). Expression levels of *lincRNA-Ehd1*(A) and *lincRNA-Lyn* (B) were examined, normalized against *Gapdh* and expressed relative to Ctl cells (unstimulated). qRT-PCR was carried out on *in vitro* *Listeria* infected macrophages (BMDM) (C) and on splenocytes from mice infected with *Listeria* (D) *lincRNA-Cox2*, expression levels were examined.

**Fig. S2. Sucrose sedimentation analysis of the cytoplasmic fraction of macrophages.** A, Macrophages incubated with cycloheximide (left panel) or cycloheximide and harringtonine (middle panel) were lysed and their cytoplasmic fraction loaded on a 10-50% (weight to volume) linear sucrose gradient. The cytoplasmic fraction of untreated cells supplemented with 35 mM EDTA was also loaded on a sucrose gradient (right panel). After sedimentation, samples were fractionated while measuring absorbance at 254nm. Absorbance values are plotted from top to bottom of the sucrose gradient: fraction 1 corresponds to the top of the gradient (lightest fraction containing tRNAs and free mRNPs) while fraction 16 corresponds to the bottom of the gradient (heaviest fraction containing large polysomes). B, Analysis of RNA levels from each fraction by real-time quantitative PCR. Relative levels of *Gapdh* (top panel), *lincRNA-Cox2* (middle panel) and *lincRNA-EPS* (bottom panel) are shown for each collected fraction and condition tested.

**Fig. S3. Schematic view of *lincRNA-Cox2* Open Reading Frames (ORFs).** A, ORFs (defined as sequences starting with an AUG triplet and ending in UAA, UAG or UGA) are depicted relative to their position within the *lincRNA-Cox2* full-length RNA and color coded with respect to the strength of the Kozak sequence surrounding the start codon.

“Poor” describes ORFs with a low likelihood of being selected by the ribosome for translation while “Good” describes those with a higher likelihood for translation. B, Position of each ORF relative to the 5' end of *lincRNA-Cox2* followed by nucleotide and amino-acid sequence, the predicted molecular weight (KDa) and the Kozak strength.

**Fig. S4: Knockdown of *lincRNA-Cox2* does not affect *Ptgs2* expression.** RNA analysis was carried out on BMDMs stably expressing lentiviral shRNA specific to *lincRNA-Cox2* or a Ctl shRNA. Expression of *Ptgs2* (*Cox2*) was measured, normalized against housekeeping genes (*Gapdh*, *hprt*, *Gusb*, *Cltc*, *Pgk1* and *Tubb*) and expressed relative to non-stimulated control (Ctl).

**Fig. S5: Knockdown of *lincRNA-Cox2* affects Pam<sub>3</sub>CSK<sub>4</sub> signaling.** *lincRNA-Cox2* was knocked down in macrophages using a lentiviral shRNA (shRNA 3). Cells were stimulated with Pam<sub>3</sub>CSK<sub>4</sub> (TLR1/2) for 24 h, Ccl5 (Rantes) (A) and IL6 (B) cytokine levels were examined by elisa (n.d means not detected).

**Fig. S6: Knockdown of *lincRNA-Cox2* does not effect IL-1 $\beta$  production.** *lincRNA-Cox2* knockdown cells were primed with LPS (TLR4) (100ng/ml) for 3h followed by stimulation with PolydA:dT (5mg/ml) for 6h or Nigericin (10mM) for 45min, IL1 $\beta$  production was measured by elisa (n.d means not detected).

**Fig. S7: Knockdown of *lincRNA-Cox2* results in elevated levels of Ccl5 (Rantes) and reduced levels of IL6.** *lincRNA-Cox2* stable knockdown cells or their relative control were stimulated with R848 (TLR7/8) (1mg/ml, A and B) or Pam<sub>2</sub>CSK<sub>4</sub> (TLR2/6) (100ng/ml, C and D) for 24 h, Ccl5 (Rantes) (A and C) and IL6 (B and D) production were examined by elisa. Data are presented as mean  $\pm$  S.D of triplicate samples from one experiment representative of three experiments (n.d means not detected).

**Fig. S8: Many upregulated ISGs in *lincRNA-Cox2* deficient cells are due to Type I IFNs.** *lincRNA-Cox2* was silenced in interferon  $\alpha/\beta$  receptor (IFN  $\alpha/\beta$  R) KO cells, RNA

was extracted and subjected to non-enzymatic RNA profiling using bar-coded fluorescent probes (custom designed codeset from Nanostring Technologies). A, Expression of direct targets of *lincRNA-Cox2*: *Ccl3*, *Ap1*, *Ccl5* and *Ip10* were measured B, Expression levels of indirect targets of *lincRNA-Cox2*: *Irf2*, *Stat3*, *Irf1*, *Stat1*, *Mndal*, *Ifi203*, *Ifi204*, *Pyhin-1*, *Irf7* were measured. All genes were normalized against housekeeping genes (*Gapdh*, *hprt*, *Gusb*, *Cltc*, *Pgk1* and *Tubb*) and expressed relative to control cells. Results represent mean  $\pm$  S.D of triplicate samples.

**Fig S9: Knockdown of *lincRNA-Cox2* does not affect TBK1 phosphorylation.** *lincRNA-Cox2* knockdown cells or Ctl cells were stimulated with LPS (TLR4) (100ng/ml), Pam<sub>3</sub>CSK<sub>4</sub> (TLR1/2) (100nM) or DMXAA (1mg/ml) for 30 min. Expression levels of phosphorylated TBK1 (top panels), total TBK1 (middle panels) and  $\beta$ -actin (lower panels) were determined by western blotting.

**Fig. S10: Global effects of *lincRNA-Cox2* on immune genes are not solely due to the loss of TLR1 expression in *lincRNA-Cox2* deficient macrophages.** *lincRNA-Cox2* knockdown cells, or cells stably reconstituted with retroviral mTLR1 were examined by qRT-PCR for expression of *Tlr1* (A) or *lincRNA-Cox2* (B). Cells were stimulated with Pam<sub>3</sub>CSK<sub>4</sub> (TLR1/2) for 24 h, *Ccl5* (Rantes) (C) and IL6 (D) cytokine levels were examined by elisa.

**Fig. S11: *lincRNA-Cox2* is localized to both the cytosolic and nuclear compartments.** A, WT BMDMs and BMDMs stably over expressing *lincRNA-Cox2* were labeled with a *lincRNA-Cox2* probe using RNA FISH, and counterstained with DAPI (DNA). B-C *lincRNA-Cox2* stable knockdown cells or Ctl cells were labeled with a *lincRNA-Cox2* probe using RNA FISH and counterstained with DAPI (DNA). D-E. Mean pixel intensity (D) and standard deviation of pixel intensity was calculated for over 100 Ctl and *lincRNA-Cox2* knockdown cells. F, Transcription foci size for Ctl and *lincRNA-Cox2* knockdown cells were determined for over 100 cells.

**Fig. S12: RNA-seq reads for *lincRNA-Cox2* in macrophages.** The distribution of RNA-seq reads at *lincRNA-Cox2* exon 4 region (chr1:152006173-152007782; mouse mm9 genome build) is shown for libraries prepared from either cytosolic or the nuclear RNA from mouse bone-marrow-derived macrophages stimulated with lipid A (the active component of LPS) for 2 hr or unstimulated (Ctl). These libraries were generated by Bhatt et al (1) and are annotated as GSM814832-C1.bam (Cytosol, Ctl), GSM814836-C5.bam (Cytosol, +LPS), GSM814837-N1.bam (Nuclear, Ctl), GSM814841-N5.bam (Nuclear, +LPS). *LincRNA-Cox2* is expressed in both the cytosolic and nuclear fractions, and induction of the lincRNA occurs in both fractions.

**Fig. S13: Knockdown of hnRNP-A/B and hnRNP-A2/B1 in BMDMs.** A-B, hnRNP-A/B and hnRNP-A2/B1 were knocked down using lentiviral shRNA in macrophages. Expression levels of hnRNP-A/B (A) and hnRNP-A2/B1 (B) were determined by western blotting.

**Fig. S14: Expression levels of *lincRNA-Cox2* are not affected in hnRNP-A/B or hnRNP-A2/B1 knockdown cells.** RNA was extracted from BMDMs stably expressing hnRNP-A/B or hnRNP-A2/B1 lentiviral shRNA and expression levels of *lincRNA-Cox2* were determined by qRT-PCR.

**Fig. S15: Genes affected by *lincRNA-Cox2*, hnRNP-A/B and hnRNP-A2/B1 knockdown in macrophages.** A-B, Venn diagrams representing common genes showing 2 fold induction over two RNA analysis experiments in all three cell lines either at basal levels (A) or following Pam<sub>3</sub>CSK<sub>4</sub> (TLR1/2) stimulation (B). C, Table showing common genes between all three cell lines showing 2 fold induction over two separate RNA analysis experiments.

**Fig. S16: Knockdown of *lincRNA-Cox2*, hnRNP-A/B or hnRNP-A2/B1 affects RNA-Pol II recruitment to *Ccl5*, *Irf7* and *Il-6* promoters.** RNA Pol II recruitment to *Ccl5* promoter (A), *Irf7* (B) promoter and *Il6* (C) promoter were measured using Chromatin

immunoprecipitation (CHIP) on cell lines with shRNA targeting *lincRNA-Cox2*, hnRNP-A/B or hnRNP-A2/B1.

**Fig. S17: Knockdown of hnRNP-A/B or A2/B1 in *lincRNA-Cox2* over-expressing cells.** A-B, hnRNP-A/B (A) or hnRNP-A2/B1 (B) were knocked down in *lincRNA-Cox2* over-expressing BMDMs using lentiviral shRNA. Knockdown of hnRNP-A/B (A) and A2/B1 (B) were confirmed by western blotting.

**Reference:**

1. D. M. Bhatt *et al.*, Transcript dynamics of proinflammatory genes revealed by sequence analysis of subcellular RNA fractions. *Cell* 150, 279 (Jul 20, 2012).

## Materials and Methods

### Reagents

LPS, Pam<sub>3</sub>CSK<sub>4</sub>, Pam<sub>2</sub>CSK<sub>4</sub>, PolyI:C, DMXAA and poly(dA:dT) were from Sigma-Aldrich (St. Louis, MO). *L. monocytogenes* (clinical isolate 10403s) was from V. Boyartchuk. Customized nCounter gene expression code sets (non-enzymatic RNA profiling using bar-coded fluorescent probes) were obtained from Nanostring Technologies (Seattle, WA). Anti- hnRNP A/B, anti-hnRNP A2/B1,  $\beta$ -actin and USF-2 were obtained from Santa Cruz Biotechnology, Inc. (Santa Cruz, CA). NF $\kappa$ B inhibitor (Bay 11-7083) was obtained from Tocris bioscience.

### Mice and Listeria infection

C57BL/6 mice were purchased from The Jackson Laboratory (Bar Harbor, ME) and bred at UMASS Medical School. Mouse strains were maintained in specific pathogen-free conditions in UMASS Medical School, and the animal protocols were carried out in accordance with the guidelines set forth by UMASS Medical School Institutional Animal Care and Use Committee. Age- and sex-matched C57BL/6 were infected with 10<sup>5</sup> cfu/ml *Listeria* (in 300 $\mu$ l) or with PBS as a control (IV via the tail vein). After 24 h spleens were harvested.

### Cell Culture and stimulation

Bone marrow cells from wild-type mice were cultured in DMEM with 10% fetal bovine serum and 20% L929 supernatants to generate BMDMs or with recombinant GM-CSF (20 $\mu$ g/ml) to generate BMDCs. BMDMs were immortalized with J2 virus. Cells were stimulated for the indicated times with LPS (TLR4) (100 ng/ml), Pam<sub>3</sub>CSK<sub>4</sub> (TLR2/1) (100 nM), Pam<sub>2</sub>CSK<sub>4</sub> (TLR2/6) (100 ng/ml), PolyI:C (TLR3) (25  $\mu$ g/ml) or poly(dA-dT) (5  $\mu$ g/ml) which was transfected with lipofectamine 2000 from Invitrogen (Grand Island, NY).

### RNA interference and Plasmids

For RNA interference two separate shRNA specific to *lincRNA-Cox2* were cloned into plko vector using the following oligos: 1Forward: 5' CCGGAAGAGTAAGATTCTGAAGA TCCTCGAGGATCTTCAGAATCTTACTCTTTTTTTG 3'. 1Reverse: 5' AATTCAAAAAA GAGTAAGATTCTGAAGATCCTCGAGGATCTTCAGAATCTTACTCTT 3'. 2Forward: 5' CCGGAAGGAATCCAGCCATCTCTCGCTCGAGCGAGAGATGGCTGGATTCTTTTTTTG 3', 2Reverse: 5'AATTCAAAAAAAGGAATCCAGCCATCTCTCGCTCGAGCGAGAGA TGGCTGGATTCTT 3'. 3Forward: 5' CCGAACCTAAAGGAGTTGACAACCTCGAG GTTGTCAACCTCTTTAGGTTTTTTG 3'. 3Reverse: 5' AATTCAAAAAACCTAAAGG AGGTTGACAACCTCGAGGTTGTCAACCTCTTTAGGTT 3'.

>*LincRNA-Cox2*

gattccctctgctgttgcctccaagatcatgcgcccagcattctgagaacccagagacaaaaggaagcttggcgtgtgaaaagccggctt  
ttaatgattgatgtgaaaagctgcacgcacattagagagacatgctgtactctggaacttctcgacaaaagaaaacatgcataagactcctcacctc

#### shRNA 2

ctgcttctgccataaaaacttctctgattcaaggaatccagccatctctcgttaactcactcagccttgattcattatcactctaaagctctgctaagtaactgttatg  
gctgtgaatgaaactgttctaagtaacaagcaataaacattgccactttcctaattggtatctaacagccacagggtagtgaatgagccct

#### shRNA 3

atggaagagctgtggcagggcaacctaaaggaggttgacaacttaatggcaagtaggagagcattttgagagagagtgacttaattaccattcaa

#### shRNA 1

atgtaagaaaacttagactgcataaagtgggaaggaaggtcttgggagagaagagtaagattctgaagatcttgagatacaagaaaaaatgaaacattag  
gataatggctagcagaaaattgaaagtcaggagagtgaaagctcagtttgcagtcacttaaatatgaatctgaatgtatattccctcctgaaactttcactagc  
ttcaaacactatggaataaagaatgtatgctcagttcttgcctcagttcactcattttgtagtgagaatttggttcttaaaaacacagaaatctgtaagaatgctttc  
atttatcccaggtgtgaaatagagctcctcagattgttcacagcaactgactgtgattgctgtgctctagcaaggcgtgatttggcagatgcagatagctttg  
caactatggtgtttctgggaactttcagaggttatatagatgatagagccctaataagtggttgaatgtgcatattgtagttgtggctggtgctgctgtttgtgtt  
acatagtcagggcaagaagaacaagaagaattagatctcgtgcttaagatcaaacctgcctcaaggaactcagatgccctaatcagcaggaagtagtcta

atgataactttatcctttccccctcaattcttcttatatgatgttaaagattgaaagaatcaaagaaaagggtgaagaagagtgaggagaagaagaaccacaaaagt  
agccaaaagtctgctatataatgttgaatcaatgtgactgtctaaacatgaactgaacaaggataacagcaatagatacaccacaaagcagattgggaaaagactat  
gaggcctcagccctacacaaggaactaaggaatgctgagagtgaggagaatagtcctatccaggggaagagcacctcagctggtatcccatactactgcccagc  
cctgaaaatgtacatacaagtaacattatacaaaactgagcaggtgtatttatatacatattacatgtgtgtatattatattatattaactttacatataatgtattacat  
ttgtagcaacaactaaataaaaaaagaggctatgaatttgaaagagagcaaggaggggcatatagaggcctgaaggagaaaagggagaagaagaaaataat  
gtaattatattataatctcaac

Control shRNAs used were EV plko from Open Biosystems (Thermo Fisher Scientific, Waltham, MA) (RHS4080), a non-targeting Ctl (1) or GFP ctl shRNA (Thermo Fisher Scientific, Waltham, MA) (# RHS4459). shRNA to hnRNP A/B (TRCN0000103641, TRCN0000103644) and hnRNP A2/B1 (TRCN0000071138, TRCN0000071142) were obtained from open biosystems. 4µg of shRNA was transfected into HEK293T cells with packaging vectors pSpax (3µg- Addgene plasmid 12260) and pMD2 (1µg- Addgene plasmid 12259) using genejuice. After 48h media was removed and transduced into immortalized BMDMs and selected using puromycin (3mg/ml).

Full length *lincRNA-Cox2* was obtained from Genscript and subsequently cloned into pgemt and pMSCV retro vector (Clontech). mTLR1 was obtained through Prof. Medzhitov (Addgene plasmid 13080) and subcloned into pMSCV vector. Retro vectors were first transfected into HEK293Ts with packaging vectors VsVg (1µg) and Gag-pol (1µg) (both vectors are available from Clontech, Mountain View, CA) using genejuice. After 48h media was removed and transduced into immortalized BMDMs and selected using neomycin (100µg/ml).

### **RNA Extraction, Real-Time PCR, PCR, RNA Analysis, RNA-Seq**

BMDM, BMDCs or splenocytes (2 to 10 × 10<sup>6</sup> cells/condition), were stimulated for 5 h. RNA was extracted with RNeasy kit (QIAGEN, Valencia, CA), 1µg of total or nuclear RNA was used for cDNA synthesis RNA was extracted from infected BMDMs at indicated time points using the iScript Select cDNA synthesis kit (Bio-Rad), and quantitative RT-PCR analysis was performed with the following primers: *LincRNA-Cox2*F: 5'AAGGAAGCTTGGCGTTGTGA 3' R: 5'GAGAGGTGAGGAGTCTTATG 3'. *Ptgs2/Cox2* gene F: GCTGTGGGGCAGGAAGTC 3', R:TTGGAATAGTTGCTCATCACC and β-actin F: 5'TTGAACATGGCATTGTTAC CAA3',R: 5'TGGCATAGAGGTCTTTACGGA3'. For splice variant analysis 1µg of total RNA was used for cDNA synthesis, RNA was extracted from primary BMDM or BMDC. Primers used for each confirm each variant are as follows, Variant 1 (JX682706) F:5'AAGGAAGCTTGGCGTTGTGA 3', R5' TGAAATGAGCCCTATGGAAGA 3'. Variant 2 (JX682707) F: 5'TGTCCCAGAGGGAGAAGGCAGCCTG 3', R5' TGAAATGAGCCCTA TGGAAGA 3'. Variant 3: (JX682708) F 5'CAGATGCTGGCAAGGATATGGAGAA3', R5' TGAAATGAGCCCTATGGAAGA 3'.

For RNA analysis, 100 ng of total RNA was used and hybridized to a custom designed gene codeset (non-enzymatic RNA profiling using bar-coded fluorescent probes) according to the manufacturers protocol (Nanostring technologies). The nCounter® Analysis System is an automated, multi-application, digital detection and counting system which directly profiles up to 100 molecules simultaneously from a single sample using a novel barcoding technology. Heatmaps representing differentially regulated genes were generated using R and scaled by log<sub>2</sub>(X-min(X) + 1). RNA-seq 10 mg of total RNA was used and libraries were generated using an illumina mRNA sample preparation kit (#RS-930-1001). Once samples were sized, quantified and proofed they were read on a High-Seq System (Illumina, San Diego, CA) as 100\*100 single reads for BMDM experiments.

### **Analysis of RNA-seq data**

RNA-seq 50bp reads were aligned to the mouse genome (assembly NCBI37) using TopHat (2). Gene level read counts based on the resulting alignments were calculated with HTSeq



(<http://www-huber.embl.de/users/anders/HTSeq/>). The Ensembl64 gtf was used as the input annotation file for the program. Subsequent data analysis was performed in R and differential gene expression specific analyses were conducted with the DESeq R package (3). Specifically, DESeq was used to normalize gene counts, calculate fold change in gene expression, estimate p-values and adjusted p-values for change in gene expression values, and to perform a variance stabilized transformation on read counts to make them amenable to plotting. Using the GOstats package (4), the top 800 up-regulated genes (using  $\log_2$ FC between base mean counts) were analyzed to detect biological processes with over-represented genes. The R package was used to color Kegg pathways according to their  $\log_2$ FC values.

### **Circos plot**

The Circos program (5) was used to visualize genome-wide gene expression changes.  $\log_2$  fold-change values were computed by subtracting the  $\log_2$  variance stabilized counts of the unstimulated sample from the  $\log_2$  variance stabilized counts of the pam3c4 stimulated sample. All protein coding genes that were annotated with particular GO IDs (GO:0006955, GO:0045088, GO:0009607, GO:0009615, GO:0006952, GO:0006954, GO:0032020, GO:0051707, GO:0051707, GO:0035455, GO:0035457, GO:0006950, GO:0001866, GO:0009611) were classified as immune genes and were colored red.

### **Accession numbers**

All raw data is available for download from NCBI Gene Expression Omnibus (<http://www.ncbi.nlm.nih.gov/geo/>) under accession number GSE40978.

### **ELISA**

Cell culture supernatants were assayed for Ccl5 (Rantes) (RnD), IL6 (eBiosciences) and IL1 $\beta$  by ELISA (BD Biosciences).

### **RNA pull-down assay and Mass spectrometry**

*lincRNA-Cox2* was in vitro transcribed using RiboMAX large scale RNA production systems –T7 (sense) and Sp6 (anti-sense, Ctl) and biotinylated cytosines were incorporated during the in vitro synthesis process. The resulting products were treated with RNase-free DNase I (Promega, Madison, WI) and purified with RNeasy Mini Kit (QIAGEN). BMDMs ( $10 \times 10^6$  cells/condition) were separated into cytosolic and nuclear fractions using a nuclear extraction kit (Active Motif). Lysates (containing Rnasin) were incubated with 1 $\mu$ g of Ctl RNA for 1 h at room temperature followed by 1 h incubation with Streptavidin beads (as a pre clearing step). Lysates were then incubated with *lincRNA-Cox2* or Ctl RNA (4 $\mu$ g) at 4 $^{\circ}$ C overnight. Interacting complexes were immunoprecipitated with streptavidin beads for 3 h at room temp and visualized by silver-staining (Pierce silver stain kit, Thermo Scientific) for mass spectrometry or by immunoblotting using specific antibodies to hnRNP A/B and hnRNP A2/B1. For Mass Spectrometry analysis a specific band present in the experimental lane was extracted (corresponding region in the control lane was also extracted). Gel pieces were trypsin digested and 10% of the peptides were injected onto a C18 spray tip and eluted into the Orbitrap and analyzed with a 35 min collision induced dissociated method (UMASS proteomics core facility). The raw data was searched in mascot against the mouse subset of the swissprot database.

### **Cell Fixation and RNA FISH**

Our standard fixation protocols have been detailed previously (6, 7). Briefly, cells were permeabilized in CSK buffer, 5% triton, and VRC (vanadyl ribonucleoside complex) for 1-3 min, then fixed in 4% Paraformaldehyde for 10min, and stored in 1XPBS or 70% EtOH. All DNA probes (1mg/reaction) were nick-translated using biotin-11-dUTP or digoxigenin-16-dUTP (Roche). Our standard protocols for RNA FISH and for simultaneous RNA/DNA detection have

been described previously in detail (6, 7). RNA-specific hybridization was carried out under non-denaturing conditions where the DNA was not accessible. Probes used for FISH were pMSCV vector expressing full-length *lincRNA-Cox2* (variant 1).

**Microscopy and Image Analysis:** Digital imaging analysis was performed using an Axiovert 200 or an Axiophot Zeiss microscope equipped with a 100X PlanApo objective (NA 1.4) and Chroma 83000 multi-bandpass dichroic and emission filter sets (Brattleboro, VT), set up in a wheel to prevent optical shift. Images were captured with an Orca-ER camera (Hamamatsu, NJ) or a cooled charge-coupled device (CCD) camera (200 series, Photometrics). Over 100 cells scored in each experiment. Key results were confirmed by at least two independent investigators. Images were minimally enhanced for brightness and contrast to more closely resemble what was seen by eye through the microscope (unless otherwise noted in the text/legends). Digital imaging software (developed inhouse, described below) was used to quantify signals.

#### **Software development:**

Software was developed using Matlab (using Image Processing Toolbox) to select cells and measure mean and standard deviation of cells.

1: Detect cells from blue channel

A: Estimate threshold to separate cells pixels from background.

B: Label pixels with values greater than threshold as belonging to a cell - pixels less than the threshold are labeled as background.

C: Discard connected cell regions with less than 10000 pixels and greater than 30000 pixels (to remove cells undergoing division).

D: Discard cell regions located at the edge of the image (not fully contained by the image).

E: A pixel mask of each valid cell is ready to be used in step 2.

2: In the green channel, measure the Adjusted Mean and Standard Deviation for each valid cell

a: Calculate the adjusted mean for each cell.

i. Calculate the background value of the green channel for the current image - the background value the most frequent value of background pixels in the green channel.

ii: Calculate the mean for each cell, subtracting the background value for that image (calculated in i).

b: Calculate the variance of each cell.

i. Calculate the variance of green channel pixels for each cell.

3: Calculate normalized histograms and cumulative distributions for the adjusted mean and standard deviation of Ctl (128 cells total) and *lincRNA-Cox2* shRNA cells (187 cells total).

#### **Chromatin immunoprecipitation (ChIP)**

Immortalized BMDMs expressing either control shRNA, or shRNA targeted against *lincRNA-Cox2*, hnRNP-A2B or hnRNP-AB were treated with the media control or the TLR2 agonist Pam<sub>3</sub>CSK<sub>4</sub> for 5 hr, and were subjected to ChIP assays using the ChIP-IT express chromatin immunoprecipitation kit (Active Motif, Carlsbad, CA) following the manufacturer's instruction. Briefly, 10 million cells were fixed in 1% formaldehyde for 10 min at 37°C to cross-link the DNA/protein complexes, followed by sonication of the isolated nuclear pellet using Bioruptor

UCD-200 (Diagenode Inc., Sparta, NJ) to shear the DNA. An aliquot of the chromatin sample (50 $\mu$ l) was reverse cross-linked overnight, treated with RNase A and Proteinase K, followed by phenol:chloroform extraction of the DNA to confirm DNA shearing to 200-500 bp chromatin fragments by agarose gel electrophoresis, and the DNA quantitation by Nanodrop. Sheared chromatin (5 $\mu$ g/IP) was immunoprecipitated with 2 $\mu$ g anti-RNA pol II (Active Motif; Clone 4H8) or IgG1 isotype control (Imgenex) antibody, and 20 $\mu$ l magentic beads for 4 hr. After reversal of the cross-linking and protein digestion with proteinase K, immunoprecipitated DNA was purified with the PCR purification kit (Qiagen). Quantitative real-time PCR analysis was performed on the input DNA (diluted 1:10) and the ChIP samples using iQ SYBR Green Supermix reagent (Bio-Rad) using the following parameters (50°C for 2 min, 95°C for 2 min, followed by 45 cycles of 95°C for 15 s, 60°C for 30 sec and 72°C for 45 sec, followed by melting curve analysis). The primer sequences used for detecting the RNA polIII recruitment on the murine genes are- *Ccl5* (for: 5'- GCCAACCCATCTTGATACCC -3', and rev: 5'- ACAGTGATGACAGGGTAGCC -3'), *IRF7* (for: 5'- AAGGGCAGTGAAGAGAAGCT -3', and rev: 5'- CCTACCAGTGCAGTCCTCAA -3'), *IL6* (for: 5'- AGACTTCCATCCAGTTGCCCT -3', and rev: 5'- CAGGTCTGTTGGGAGTGGTA -3'), *gapdh* (for: 5'- TAGGACTGGATAAGCAGGGC -3', and rev: 5'-GAACAGGGAGGAGCAGAGAG -3'). All oligo sequences were designed using Primer3web (<http://primer3.wi.mit.edu/>), and were targeted within the 500 nucleotides region downstream of the transcription start site of each gene. The specificity of amplification was assessed for each target gene by melting curve analysis, and the amplicon size was confirmed by agarose gel electrophoresis. RNA polIII enrichment in the IgG and RNA polIII ChIP samples were normalized to the input DNA, and is represented as % Input. Experiments were performed at least three times with independent chromatin samples and yielded similar results.

### **Sucrose sedimentation analysis**

Macrophages were seeded at 5 million cells in a 100mm dish. After 16 h of culture cells were pretreated with cycloheximide (100  $\mu$  g.ml<sup>-1</sup>) for 10 min at 37°C or with harringtonine (2 $\mu$ g.ml<sup>-1</sup>) for 25 min followed by cycloheximide (100  $\mu$  g.ml<sup>-1</sup>) for 10 min. Cells were washed twice in ice-cold PBS+Cycloheximide (100  $\mu$  g.ml<sup>-1</sup>) and scraped in 1ml of PBS+Cycloheximide (100  $\mu$  g.ml<sup>-1</sup>). Cells were then pelleted at 500g for 5 min at 4°C and lysed in 1ml of lysis buffer (10mM Tris-HCl pH. 7.5; 5mM MgCl<sub>2</sub>; 100mM KCl; 1% Triton X-100; 2mM DTT; 100  $\mu$  g/ml Cycloheximide and 1X Protease-Inhibitor Cocktail EDTA-free (Roche). Lysate was homogenized by gently pipetting up and down for a total of eight strokes using a P1000 pipettor. After incubation at 4°C for 10 min, lysate was cleared at 1300.g for 10 min at 4°C, the supernatant recovered and absorbance at 260nm measured. 10 A260 units complemented or not with 35 mM of EDTA were loaded on top of a 10 to 50% (Weight/Volume) sucrose gradient (20mM HEPES-KOH pH. 7.4; 5mM MgCl<sub>2</sub>; 100mM KCl; 2mM DTT; 100  $\mu$  g.ml<sup>-1</sup> of Cycloheximide) and centrifuged in a SW-40ti rotor at 35,000 rpm for 2h40min at 4°C. After centrifugation, samples were collected from the top of the gradient into 15 fractions while absorbance at 254nm was measured. Collected fractions were complemented with 0.4 femto moles of a firefly coding RNA (Spike-In), SDS (1% final), proteinase K (200  $\mu$  g.ml<sup>-1</sup>) and incubated at 42°C for 45 min. After proteinase K treatment, RNA was extracted using one volume of Phenol (pH 4.5):Chloroform:Iso-amyl alcohol (25:24:1). The recovered aqueous phase was supplemented with 20  $\mu$  g of glycogen, 300 mM sodium acetate pH 5.2, and 10 mM MgCl<sub>2</sub>. RNA was precipitated with 3 volumes of 100% ethanol at -20°C overnight. After a wash with 70% ethanol, RNA was re-suspended in 50  $\mu$  l of water.

## References:

1. V. Hornung *et al.*, AIM2 recognizes cytosolic dsDNA and forms a caspase-1-activating inflammasome with ASC. *Nature* **458**, 514 (Mar 26, 2009).
2. C. Trapnell, L. Pachter, S. L. Salzberg, TopHat: discovering splice junctions with RNA-Seq. *Bioinformatics* **25**, 1105 (May 1, 2009).
3. S. Anders, W. Huber, Differential expression analysis for sequence count data. *Genome biology* **11**, R106 (2010).
4. S. Falcon, R. Gentleman, Using GOSTATS to test gene lists for GO term association. *Bioinformatics* **23**, 257 (Jan 15, 2007).
5. M. Krzywinski *et al.*, Circos: an information aesthetic for comparative genomics. *Genome research* **19**, 1639 (Sep, 2009).
6. C. V. Johnson, R. H. Singer, J. B. Lawrence, Fluorescent detection of nuclear RNA and DNA: implications for genome organization. *Methods in cell biology* **35**, 73 (1991).
7. R. Tam, K. P. Smith, J. B. Lawrence, The 4q subtelomere harboring the FSHD locus is specifically anchored with peripheral heterochromatin unlike most human telomeres. *The Journal of cell biology* **167**, 269 (Oct 25, 2004).
